# Supplementary material for: IKBA phosphorylation governs human sperm motility through ACC-mediated fatty acid beta-oxidation
Source: PubMed Central journal article supplement (PMC10039860; doi:10.1038/s42003-023-04693-6), 2023-03-25
Supplement: 42003_2023_4693_MOESM1_ESM.pdf [file 42003_2023_4693_MOESM1_ESM.pdf]

# **IKBA phosphorylation governs human sperm motility through ACC-mediated fatty acid beta-oxidation**

## **Supplementary Information**

|                                |            |
|--------------------------------|------------|
| <b>Supplementary Table 1.</b>  | <b>2-3</b> |
| <b>Supplementary Table 2.</b>  | <b>4</b>   |
| <b>Supplementary Videos.</b>   | <b>5</b>   |
| <b>Supplementary Figure 1.</b> | <b>6-7</b> |
| <b>Supplementary Figure 2.</b> | <b>8</b>   |
| <b>Supplementary Figure 3.</b> | <b>9</b>   |
| <b>Supplementary Figure 4.</b> | <b>10</b>  |
| <b>Supplementary Figure 5.</b> | <b>11</b>  |
| <b>Supplementary Figure 6.</b> | <b>12</b>  |
| <b>Supplementary Figure 7.</b> | <b>13</b>  |

**Supplementary Table 1.**

| <b>Antibodies Information</b>                                 |                             |                     |           |           |
|---------------------------------------------------------------|-----------------------------|---------------------|-----------|-----------|
| <b>Antibodies</b>                                             | <b>Manufactures</b>         | <b>Product code</b> | <b>WB</b> | <b>IF</b> |
| Anti-I $\kappa$ B- $\alpha$ (C-21)                            | Santa Cruz Biotechnology    | SC-371              | 1:1000    | 1:50      |
| Anti-I $\kappa$ B- $\alpha$ (H-4)                             | Santa Cruz Biotechnology    | sc-1643             | 1:1000    | 1:50      |
| anti-I $\kappa$ B- $\beta$ (C-20)                             | Santa Cruz Biotechnology    | SC-945              | 1:1000    | /         |
| anti-IKK $\gamma$ (B-3)                                       | Santa Cruz Biotechnology    | SC-8032             | 1:1000    | /         |
| Anti-phosphotyrosine monoclonal antibody                      | Merck Millipore Corporation | 4G10                | 1:8000    | /         |
| anti- $\alpha$ -tubulin monoclonal antibody                   | Merck Millipore Corporation | T6199               | 1:10000   | /         |
| NF- $\kappa$ B p65 (D14E12) XP <sup>®</sup> Rabbit mAb        | Cell Signaling Technology.  | 8242                | 1:2000    | 1:100     |
| Phospho-NF- $\kappa$ B p65 (Ser536) (93H1) Rabbit mAb         | Cell Signaling Technology.  | 3033                | 1:2000    | /         |
| RelB (D7D7W) Rabbit mAb                                       | Cell Signaling Technology.  | 10544               | 1:2000    | /         |
| c-Rel (D4Y6M) Rabbit mAb                                      | Cell Signaling Technology.  | 12707               | 1:2000    | /         |
| NF- $\kappa$ B1 p105/p50 (D4P4D) Rabbit mAb                   | Cell Signaling Technology.  | 13568               | 1:2000    | /         |
| NF- $\kappa$ B2 p100/p52 (D7A9K) Rabbit mAb                   | Cell Signaling Technology.  | 37359               | 1:2000    | /         |
| IKK $\alpha$ (3G12) Mouse mAb                                 | Cell Signaling Technology.  | 61294               | 1:2000    | 1:100     |
| IKK $\beta$ (D30C6) Rabbit mAb                                | Cell Signaling Technology.  | 8943                | 1:2000    | 1:100     |
| Phospho-IKK $\alpha$ / $\beta$ (Ser176/180) (16A6) Rabbit mAb | Cell Signaling Technology.  | 2697                | 1:2000    | /         |
| Phospho-I $\kappa$ B $\alpha$ (Ser32/36) (5A5) Mouse mAb      | Cell Signaling Technology.  | 9246                | 1:2000    | /         |
| Acetyl-CoA Carboxylase (C83B10) Rabbit mAb                    | Cell Signaling Technology.  | 3676                | 1:2000    | 1:100     |

|                                                                                              |                            |            |        |        |
|----------------------------------------------------------------------------------------------|----------------------------|------------|--------|--------|
| Phospho-Acetyl-CoA Carboxylase (Ser79) (D7D11) Rabbit mAb                                    | Cell Signaling Technology. | 11818      | 1:2000 | /      |
| Phospho-AMPK $\alpha$ (Thr172) (40H9) Rabbit mAb                                             | Cell Signaling Technology. | 2535       | 1:2000 | /      |
| AMPK $\alpha$ (D5A2) Rabbit mAb                                                              | Cell Signaling Technology. | 5831       | 1:2000 | /      |
| anti-rabbit IgG horseradish peroxidase linked antibody                                       | Cell Signaling Technology. | 7074       | 1:5000 | /      |
| anti-mouse IgG horseradish peroxidase linked antibody                                        | Cell Signaling Technology. | 7076       | 1:5000 | /      |
| ACSL1 Polyclonal antibody                                                                    | Proteintech                | 13989-1-AP | 1:2000 | 1:100  |
| ACADL-Specific Polyclonal antibody                                                           | Proteintech                | 17526-1-AP | 1:2000 | 1:100  |
| ACADVL Polyclonal Antibody                                                                   | Proteintech                | 14527-1-AP | 1:2000 | 1:100  |
| HADHA Polyclonal antibody                                                                    | Proteintech                | 10758-1-AP | 1:2000 | 1:100  |
| Anti-CPT1A antibody                                                                          | Abcam                      | ab128568   | 1:2000 | 1:100  |
| Donkey anti-Rabbit IgG (H+L) Highly Cross-Adsorbed Secondary Antibody, Alexa Fluor™ Plus 488 | Thermo Scientific          | A32790     | /      | 1:1000 |
| Donkey anti-Mouse IgG (H+L) Highly Cross-Adsorbed Secondary Antibody, Alexa Fluor™ Plus 488  | Thermo Scientific          | A32766     | /      | 1:1000 |

**Supplementary Table 2. sgRNAs used for generating knockout mice.**

The sgRNAs targeting the gene's upstream (U) and downstream (D) regions are presented.

| <b>Gene</b>   |   | <b>sgRNA sequences</b> | <b>PAM</b> | <b>KO/strategy</b>    |
|---------------|---|------------------------|------------|-----------------------|
| <i>Nfkbia</i> | U | TGAGACAGGGTTTACGTTGT   | AGG        | Zygote/Microinjection |
|               | D | GAGGTCTTTATGACCCACCT   | AGG        | Zygote/Microinjection |

## **Supplementary Videos**

**Supplementary Video 1 - 2.** The motive video of sperm with relatively low VCL base level incubated in BWW medium with (Supplementary Video 1) or without (Supplementary Video 2) Bay117082 for 10 min. Sperm mainly displays as higher curvilinear velocity and an alteration from forward movement to curvilinear movement under the action of Bay117082.

**Supplementary Video 3 - 4.** The motive video of sperm with relatively high VCL base level incubated in BWW medium with (Supplementary Video 3) or without Bay117082 (Supplementary Video 4) for 10min. Sperm mainly displays an alteration from forward movement to curvilinear movement, but not a significantly increase of curvilinear velocity under the action of Bay117082.

## Supplementary Figure 1

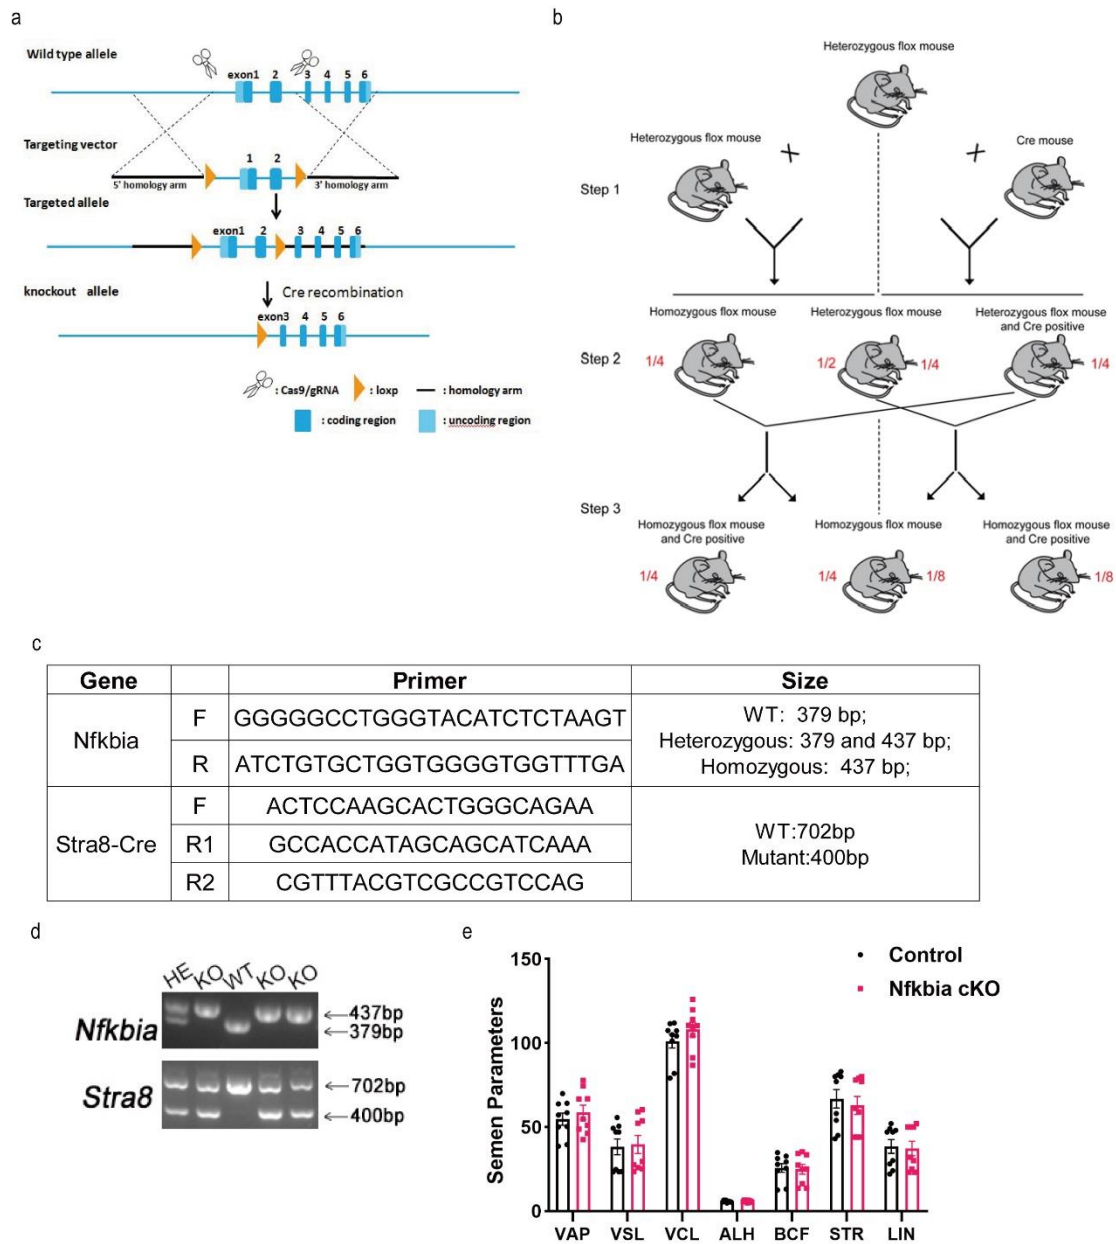

### Supplementary Figure 1. Establishment of IKBA<sup>-/-</sup> mouse

a: Schematic diagram of *loxP*-flanked *Nfkbia* allele. We designed the *loxP* sites on both sides of exon1 and exon2 of *Nfkbia* to make the deletion of IKBA protein.

b: The breeding strategy of IKBA conditional knockout mouse. Mice carrying *loxP*-flanked *Nfkbia* allele (*Nfkbia*<sup>lox/-</sup>) crossed with *Stra8-Cre* mice. Fitters with genotype (*Nfkbia*<sup>lox/lox</sup>; *Stra8-Cre*) were the IKBA spermatocyte conditional knockout mice.

c - d: Identification of mouse genotyping by PCR and the electrophoresis of PCR products was shown (d). The primers were indicated in the table (c). WT, wild type; HE, heterozygote; HO, homozygote.

e: Sperm motility parameters of control mouse and IKBA<sup>-/-</sup> mouse. n = 9.

## Supplementary Figure 2.

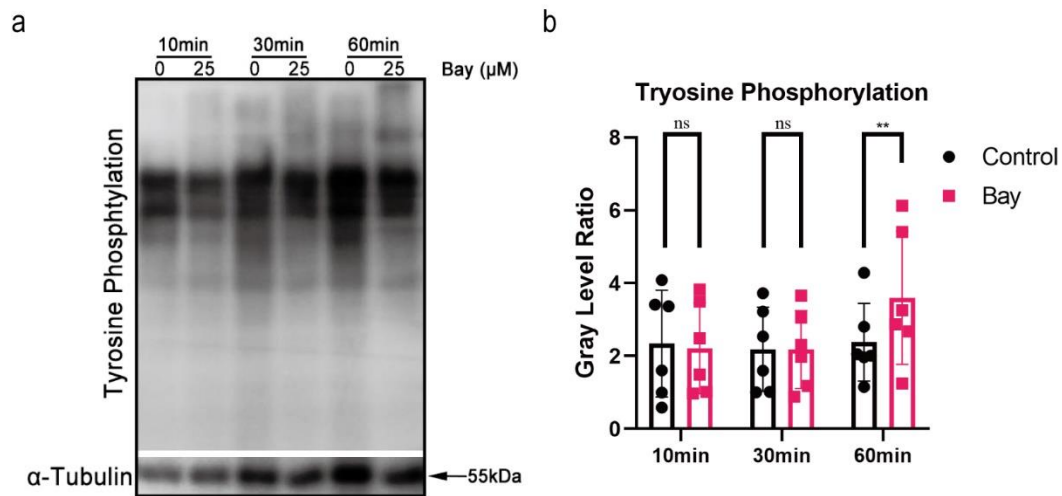

**Supplementary Figure 2. The change of protein tyrosine phosphorylation level of sperm treated with Bay117082.**

a: The protein tyrosine phosphorylation level of human sperm incubated in BWB with or without Bay117082 for 10, 30, and 60 mins. The antibody  $\alpha$ -Tubulin was applied to assess protein loading.

b: Statistical analysis of gray values contained all bands visualized in protein tyrosine phosphorylation.  $n = 6$ .  $**p < 0.01$  as compared with the corresponding control ( $0 \mu\text{M}$ ).



### Supplementary Figure 3

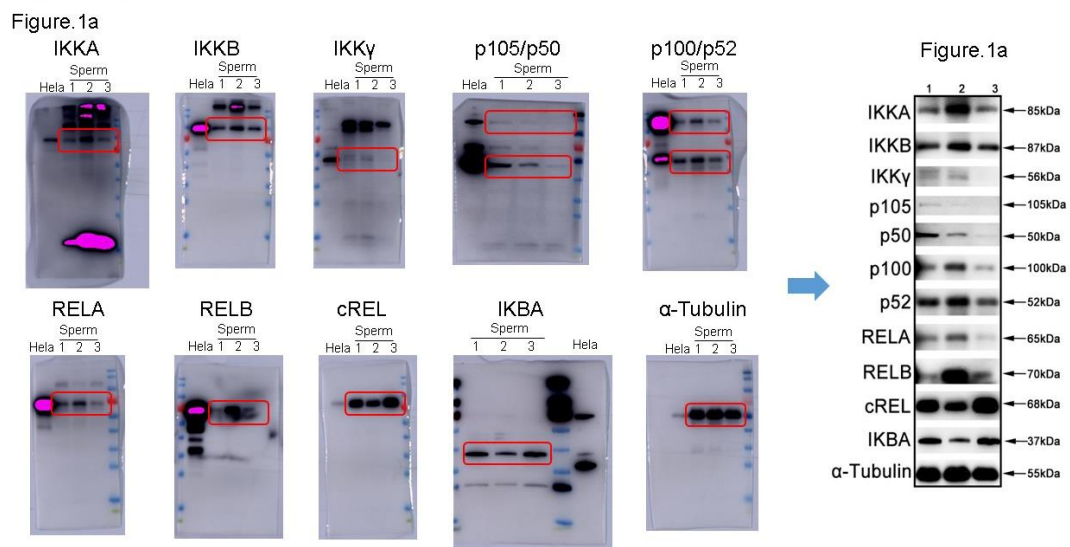

Supplementary Figure 3. The original images of blots of Fig. 1a

## Supplementary Figure 4

Figure. 1b

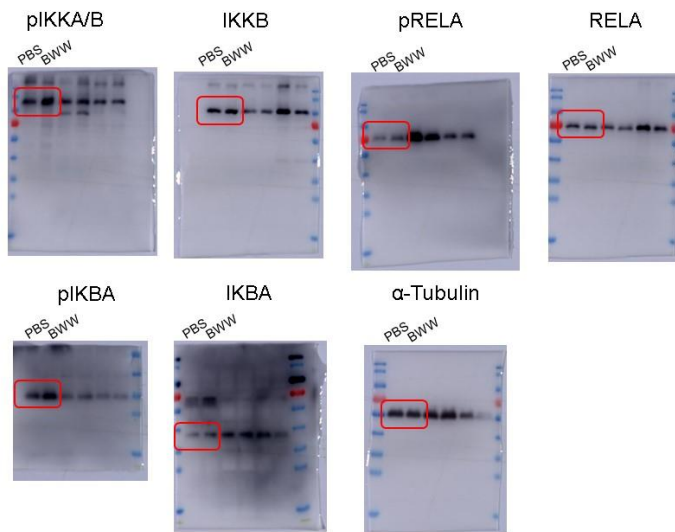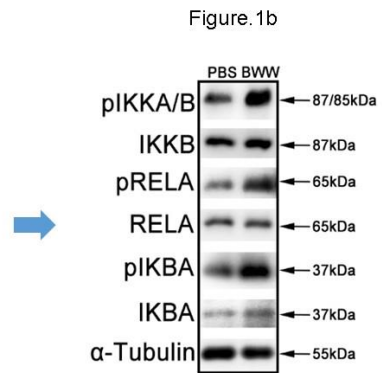

Supplementary Figure 4. The original images of blots of Fig. 1b

## Supplementary Figure 5

Figure.2a

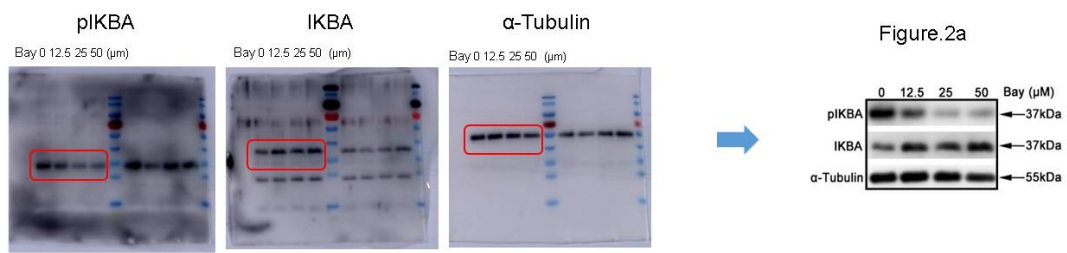

Figure.2d

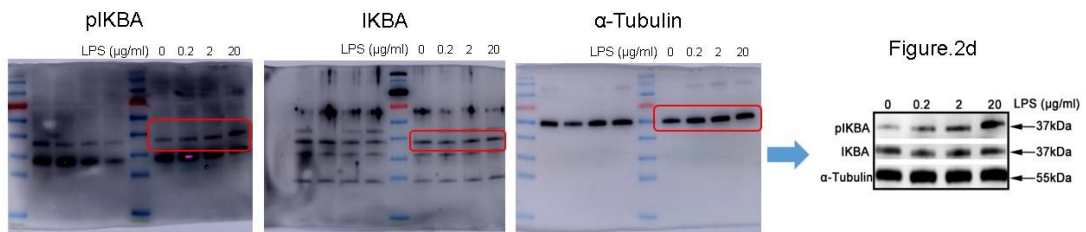

Supplementary Figure 5. The original images of blots of Fig. 2a and Fig. 2d

## Supplementary Figure 6

Figure.6a

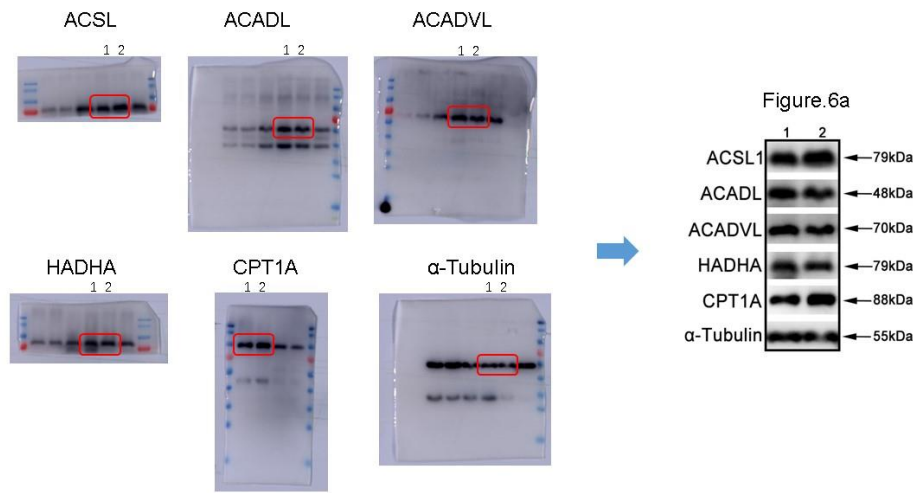

Supplementary Figure 6. The original images of blots of Fig. 6a

## Supplementary Figure 7

Figure.6i

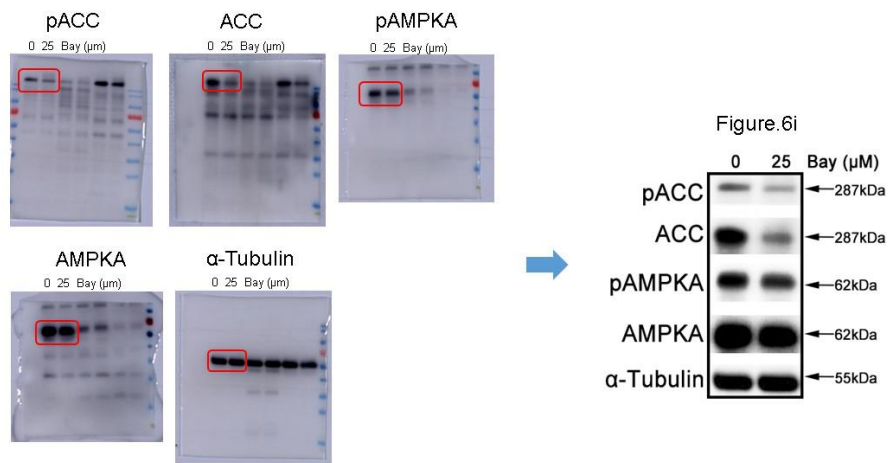

Supplementary Figure 7. The original images of blots of Fig. 6i

## Supplementary Figure 8

Figure. 7a

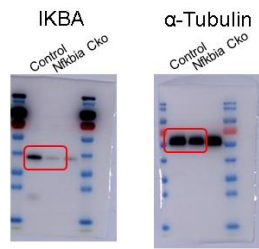

Figure. 7a

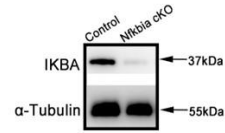

Supplementary Figure.2a

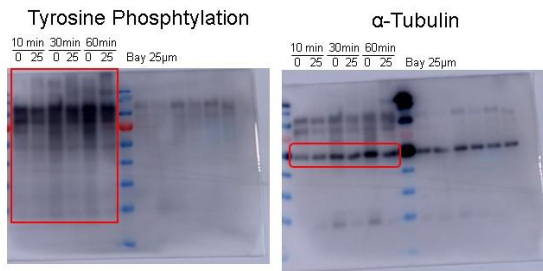

Supplementary Figure.2a

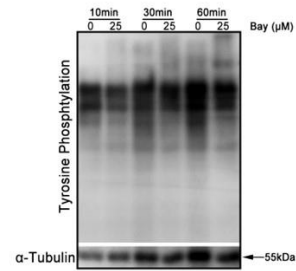

**Supplementary Figure 8. The original images of blots of Fig. 7a and Supplementary Figure. 2a.**
